# Supplementary material for: Hexagonal petal-like cobalt oxide nanowire arrays encapsulated by MOF-derived Co/N-codoped carbon for boosting electrochemical capacitor behaviour
Source: Royal Society of Chemistry journal article supplement (doi:10.1039/d1qm00429h), 2021-01-01
Supplement: d1qm00429h1.pdf [file d1qm00429h1.pdf]

# Hexagonal Petals-like Cobalt Oxide Nanowire Arrays Encapsulated by MOF-derived Co/N-codoped Carbon for Boosting Electrochemical Capacitor Behaviour

Xiao-Man Cao,<sup>a,c</sup> Zhi-Jia Sun<sup>\*a,c</sup> and Zheng-Bo Han<sup>\*b</sup>

<sup>a</sup> College of Chemistry and Materials Engineering, Bohai University, Jinzhou 121013, P.R. China. E-mail: sunzhijia@bhu.edu.cn.

<sup>b</sup> College of Chemistry, Liaoning University. Shenyang 110036, P.R. China. E-mail: ceshzb@lnu.edu.cn

<sup>c</sup> Liaoning Engineering Technology Research Center of Supercapacitor, Bohai University, Jinzhou 121013, P.R. China.

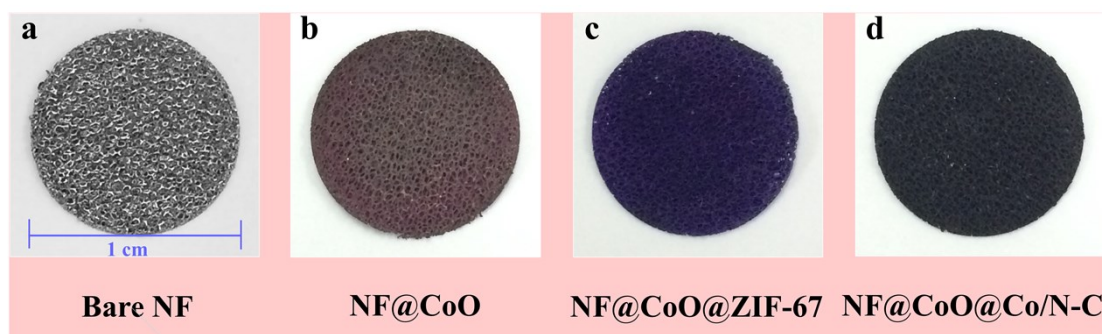

Figure S1. Photographs of the bare NF, NF@CoO, NF@CoO@ZIF-67 and NF@CoO@Co/N-C samples.

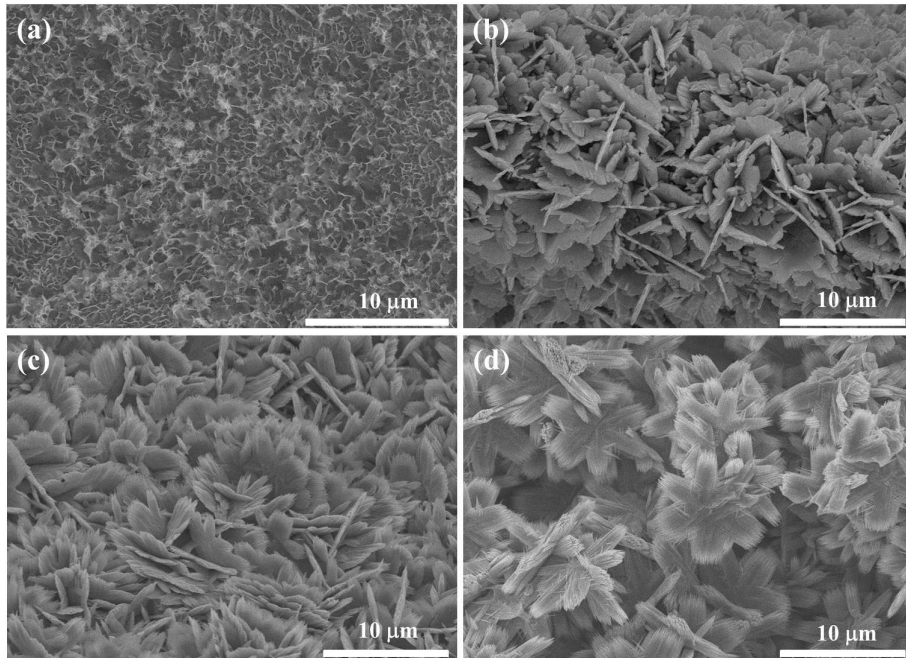

Figure S2. Formation process of nanowire-assembled hexagonal petals-like CoO. SEM images of CoO prepared at different reaction time length: (a) 10 min; (b) 1 h; (c) 5h; (d) 10 h.

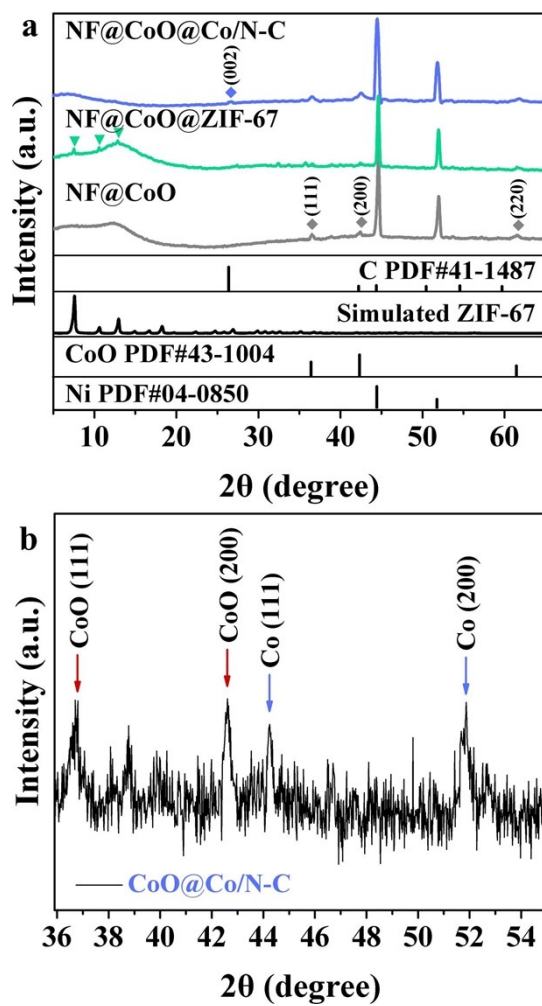

Figure S3. (a) PXRD patterns of NF@CoO, NF@CoO@ZIF-67 and NF@CoO@Co/N-C, (b) the enlarged PXRD pattern of CoO@Co/N-C powder sample without nickel foam.

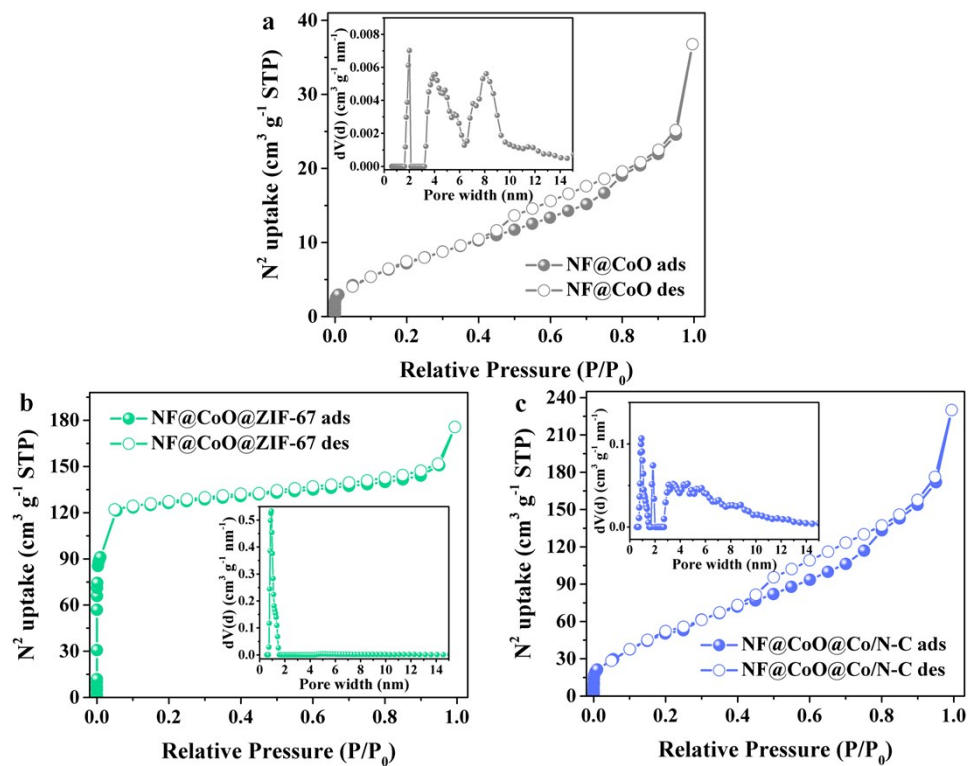

Figure S4. Nitrogen (77K) adsorption-desorption isotherms and pore size distribution for NF@CoO, NF@CoO@ZIF-67 and NF@CoO@Co/N-C.

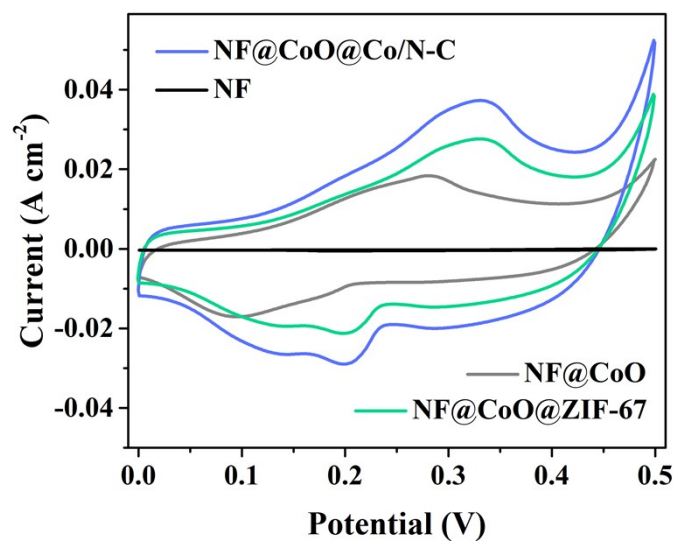

Figure S5. Cyclic voltammograms of bare NF, NF@CoO, NF@CoO@ZIF-67 and NF@CoO@Co/N-C at scan rate of 6 mV s<sup>-1</sup>.

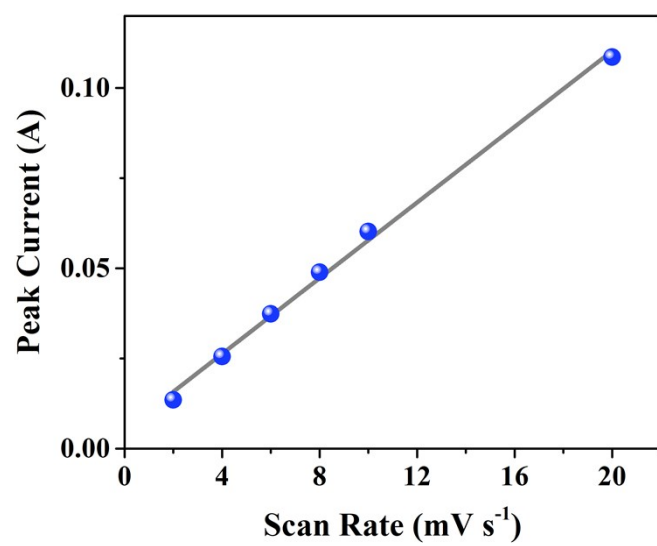

Figure S6. Relationship between anodic peak current and scan rate for NF@CoO@Co/N-C.

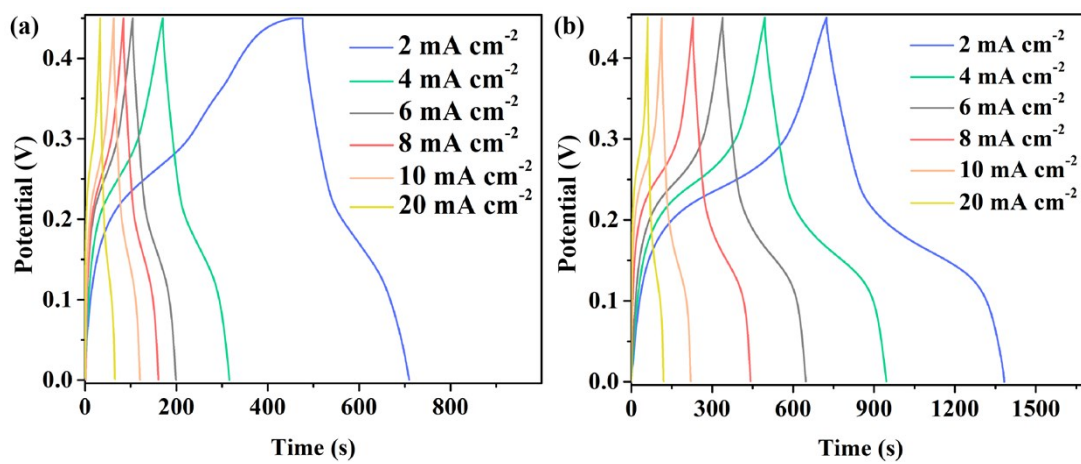

Figure S7. GCD curves recorded at different current densities from 2 to 20 mA cm<sup>-2</sup> for (a) NF@CoO, (b) NF@CoO@ZIF-67.

Table S1. Comparison of capacitance and rate capability of NF@CoO@Co/N-C with recently reported cobaltous oxide-based electrodes.

| Electrode                                                | Current density/<br>Scan rate | Electrolyte    | Capacitance                                                     | Rate capability                                 |
|----------------------------------------------------------|-------------------------------|----------------|-----------------------------------------------------------------|-------------------------------------------------|
| CoO <sup>S1</sup>                                        | 0.5 A g <sup>-1</sup>         | 1 M KOH        | 600 F g <sup>-1</sup>                                           | 0.5~16 A g <sup>-1</sup> (32 times) 69.3%       |
| Co <sub>3</sub> O <sub>4</sub> @CoO@carbon <sup>S2</sup> | 1 A g <sup>-1</sup>           | 1 M KOH        | 324 F g <sup>-1</sup>                                           | 1~10 A g <sup>-1</sup> (10 times) 63.9%         |
| Co <sub>3</sub> O <sub>4</sub> @CoO <sup>S3</sup>        | 0.2 A g <sup>-1</sup>         | 6 M KOH        | 362.8 F g <sup>-1</sup>                                         | 0.2~4 A g <sup>-1</sup> (20 times) 78.7%        |
| Co <sub>3</sub> O <sub>4</sub> @CoO@Co@C <sup>S4</sup>   | 2 A g <sup>-1</sup>           | 1 M KOH        | 370 F g <sup>-1</sup>                                           | 1~40 mV s <sup>-1</sup> (40 times) 64%          |
| CoO/Co <sub>9</sub> S <sub>8</sub> @CN <sup>S5</sup>     | 0.5 A g <sup>-1</sup>         | 6 M KOH        | 303.3 F g <sup>-1</sup>                                         | 0.5~5 A g <sup>-1</sup> (10 times) 70.0%        |
| CoCO <sub>3</sub> @CoO <sup>S6</sup>                     | 1 A g <sup>-1</sup>           | 1 M KOH        | 0.77 F cm <sup>-2</sup><br>510 F g <sup>-1</sup>                | 0.2~10 A g <sup>-1</sup> (50 times) 82.0%       |
| CoO nanowall <sup>S7</sup>                               | 1 A g <sup>-1</sup>           | 6 M KOH        | 352 F g <sup>-1</sup>                                           | 1~20 A g <sup>-1</sup> (20 times) 72.7%         |
| CoO@MnO <sub>2</sub> <sup>S8</sup>                       | 2 mA cm <sup>-2</sup>         | 6 M KOH        | 2.40 F cm <sup>-2</sup>                                         | 2~20 mA cm <sup>-2</sup> (10 times) 57.5%       |
| C/CoO-200 <sup>S9</sup>                                  | 0.5 A g <sup>-1</sup>         | 2 M KOH        | 207 F g <sup>-1</sup>                                           | 0.5~10 A g <sup>-1</sup> (20 times) 79.6%       |
| CoO@MnO <sub>2</sub> NNAs <sup>S10</sup>                 | 2 mA cm <sup>-2</sup>         | 6 M KOH        | 3.03 F cm <sup>-2</sup>                                         | 2~20 mA cm <sup>-2</sup> (20 times) 46.9%       |
| <b>NF@CoO*</b>                                           | <b>2 mA cm<sup>-2</sup></b>   | <b>6 M KOH</b> | <b>2.32 F cm<sup>-2</sup></b>                                   | <b>2~20 mA cm<sup>-2</sup> (10 times) 52.2%</b> |
| <b>NF@CoO@ZIF-67*</b>                                    | <b>2 mA cm<sup>-2</sup></b>   | <b>6 M KOH</b> | <b>3.13 F cm<sup>-2</sup></b>                                   | <b>2~20 mA cm<sup>-2</sup> (10 times) 71.2%</b> |
| <b>NF@CoO@Co/N-C*</b>                                    | <b>2 mA cm<sup>-2</sup></b>   | <b>6 M KOH</b> | <b>5.61 F cm<sup>-2</sup></b><br><b>1693.4 F g<sup>-1</sup></b> | <b>2~20 mA cm<sup>-2</sup> (10 times) 91.3%</b> |

\*This work



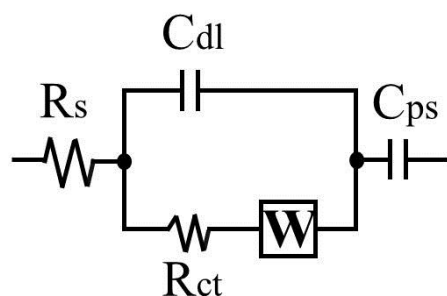

Figure S8. The equivalent circuit mode for the Nyquist plots of NF@CoO, NF@CoO@ZIF-67 and NF@CoO@Co/N-C.

The equivalent circuit for the Nyquist plots of the samples is shown in Figure S8. The semicircle and linear region indicate the charge-transfer resistance ( $R_{ct}$ ) and Warburg impedance ( $W$ ), which indicates ion diffusion/transport from the electrolyte to the electrode surface. The intercept with the real axis ( $Z_{Re}$ ) at high frequency indicates electrolyte resistance ( $R_s$ ).  $C_{dl}$  is the double layer capacitance and  $C_{ps}$  is the pseudocapacitance.

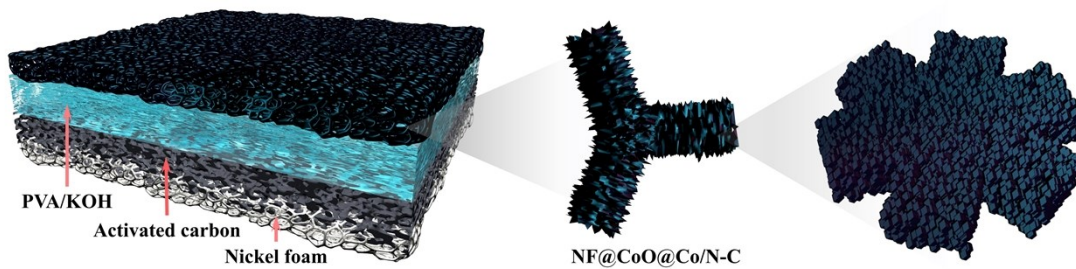

Figure S9. Schematic representation of the ASC device by using NF@CoO@Co/N-C cathode, activated carbon (AC) anode, and PVA/KOH gel as electrolyte.

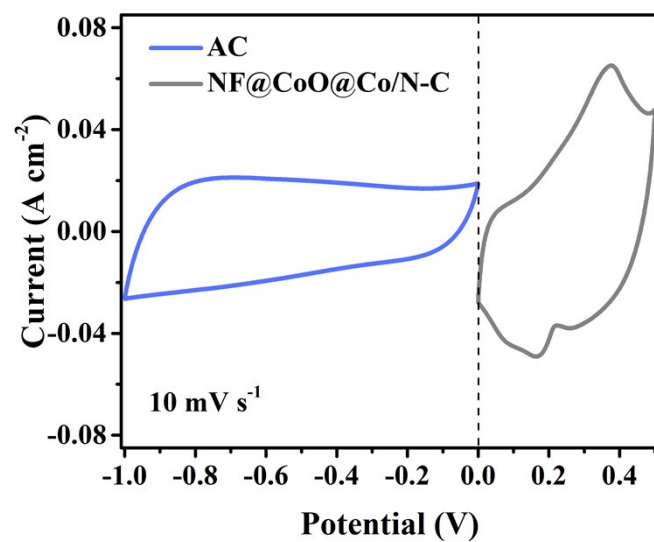

Figure S10. CV curves collected for NF@CoO@Co/N-C and AC electrodes at a scan rate of 10 mV s<sup>-1</sup>.

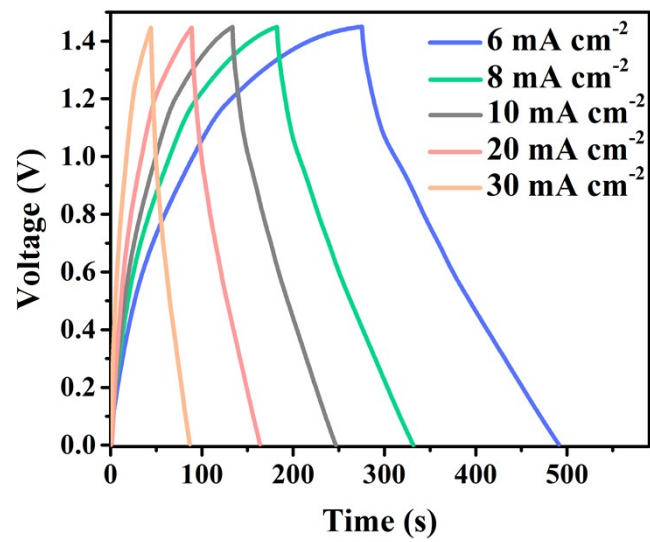

Figure S11. GCD curves of the ASC device at different current densities.

Initial state

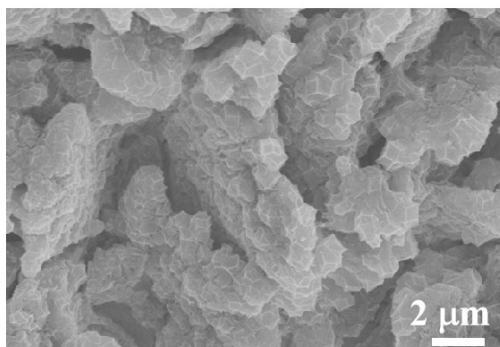

After 10000 cycles

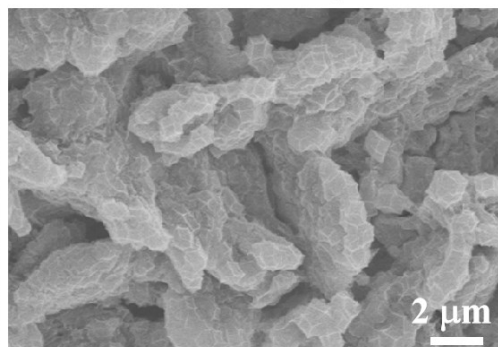

Figure S12. SEM images of NF@CoO@Co/N-C before and after 10000 cycles.

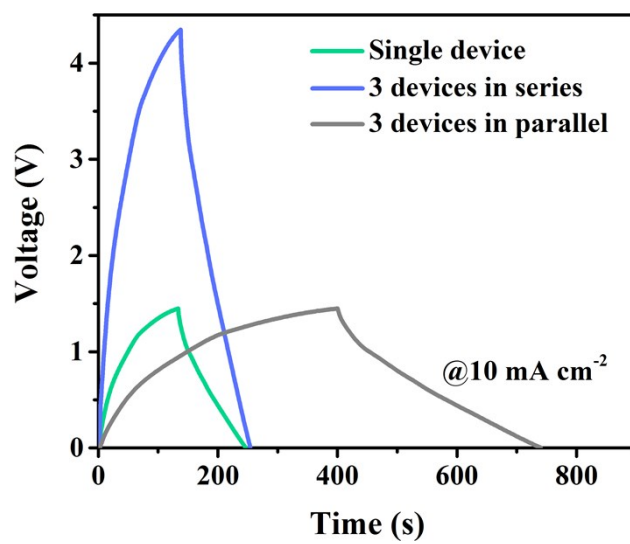

Figure S13. GCD curves of the ASC devices connected in series and in parallel.

## Supporting references

- (1) C. Zheng, C. B. Cao, Z. Ali, J. H. Hou, *J. Mater. Chem. A*, 2014, **2**, 16467-16473.
- (2) E. Duraisamy, H. T. Das, A. S. Sharma, P. Elumalai, *New J. Chem.*, 2018, **42**, 6114-6124.
- (3) J. C. Deng, L. T. Kang, G. L. Bai, Y. Li, P. Y. Li, X. G. Liu, Y. Z. Yang, F. Gao, W. Liang, *Electrochimica Acta*, 2017, **132**, 127-135.
- (4) D. Y. Xu, C. P. Mu, J. Y. Xiang, F. S. Wen, C. Su, C. X. Hao, W. T. Hu, Y. F. Tang, Z. Y. Liu, *Electrochimica Acta*, 2016, **220**, 322-330.
- (5) C. Shi, M. W. Chen, X. Han, Y. F. Bi, L. L. Huang, K. Zhou, Z. P. Zheng, *Inorg. Cherm. Front.*, 2018, **5**, 1329-1335.
- (6) X. Ji, S. Cheng, L. F. Yang, Y. Jiang, Z. J. Jiang, C. H. Yang, H. Zhang, M. L. Liu, *Nano Energy*, 2015, **11**, 736-745.
- (7) N. Tang, W. Wang, H. H. You, Z. J. Zhai, J. Hilario, L. Zeng, L. Zhang, *Catal. Today*.  
<https://doi.org/10.1016/j.cattod.2018.03.024>
- (8) X. Z. Wang, Y. H. Xiao, D. C. Su, S. G. Xu, L. M. Zhou, S. D. Wu, L. F. Han, S. M. Fang, S. K. Cao, 2016, *Int. J. Hydrogen Energy*, 2016, **41**, 13540-13548.
- (9) J. Y. Long, Z. S. Yan, Y. Gong, J. H. Lin, *Appl. Surf. Sci.*, 2018, **448**, 50-63.
- (10) X. Z. Wang, Y. H. Xiao, D. C. Su, L. M. Zhou, S. D. Wu, L. F. Han, S. M. Fang, S. K. Cao, *Electrochimica Acta*, 2016, **194**, 377-384.
